# Supplementary material for: Metagenomic Exploration of the Marine Sponge Mycale hentscheli Uncovers Multiple Polyketide-Producing Bacterial Symbionts
Source: PubMed Central journal article supplement (PMC7157528; doi:10.1128/mbio.02997-19), 2020-03-24

**A.**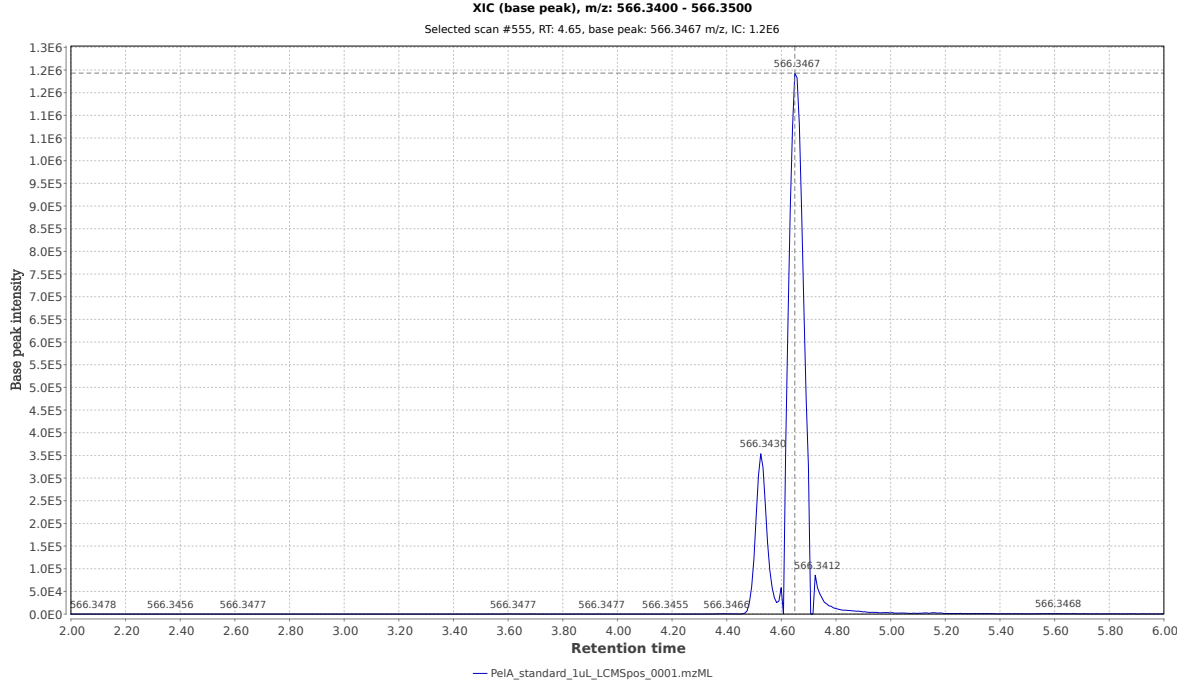**B.**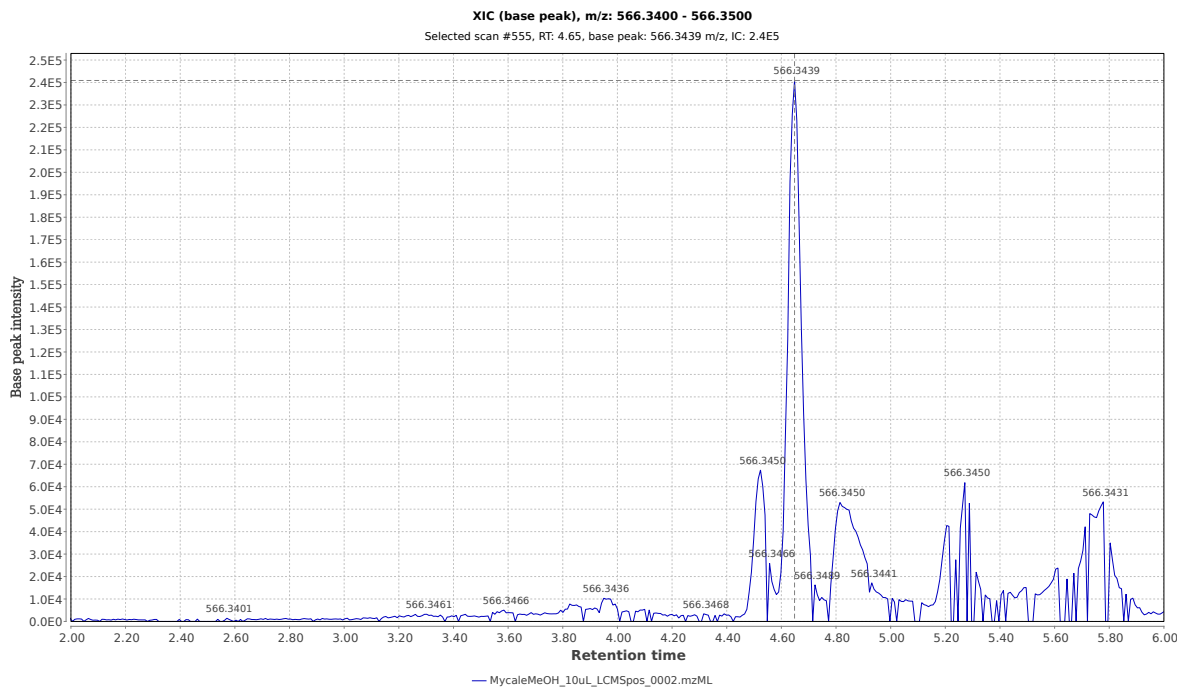

Supplement: mBio.02997-19-sf001.pdf [file mBio.02997-19-sf001.pdf]
