# Supplementary material for: Metagenomic Exploration of the Marine Sponge Mycale hentscheli Uncovers Multiple Polyketide-Producing Bacterial Symbionts
Source: PubMed Central journal article supplement (PMC7157528; doi:10.1128/mbio.02997-19), 2020-03-24
Supplement: mBio.02997-19-sf006.pdf [file mBio.02997-19-sf006.pdf]

PAT

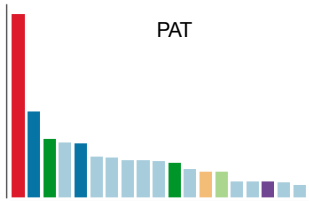

S3

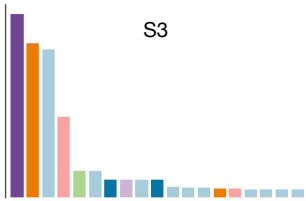

S1

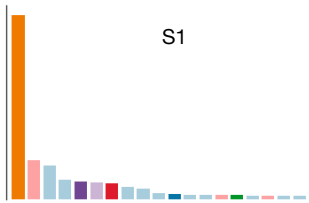

S5

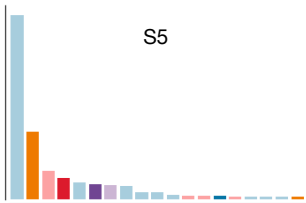

S2

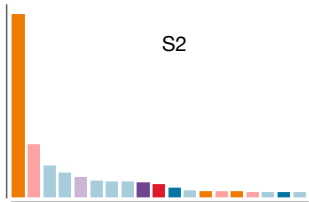

- |                                                                                                  |                                                                                                     |
|--------------------------------------------------------------------------------------------------|-----------------------------------------------------------------------------------------------------|
|  Proteobacteria |  Kiritimatiellaota |
|  Actinobacteria |  Nitrospirae       |
|  Bacteroidetes  |  Planctomycetes    |
|  Cyanobacteria  |  Thaumarchaeota    |
|  Dadabacteria   |  Acidobacteria     |
